# Supplementary material for: Four-Dimensional Stimuli-Responsive Hydrogels Micro-Structured via Femtosecond Laser Additive Manufacturing
Source: Micromachines (Basel). 2021 Dec 27;13(1):32. doi: 10.3390/mi13010032 (PMC8779986; doi:10.3390/mi13010032)
Supplement: Supplementary file 1 [file micromachines-13-00032-s001.zip]

Archive with 10 entries (10 files):
- micromachines-1487489-supplementary.pdf
- S1-532nm laser beam scanning in photoresist.mov
- S2-Swelled microlenses by dropping water.mov
- S3-Single swelled microlens.mov
- S4-pH responsiveness.mov
- S5-Shrinkage of hydrogel.mov
- S6-Leg moving of a spider-shaped hydrogel by laser focus.mov
- S7- No obvious motion when laser scans spider in air.mov
- S8-Tail swelling of a tadpole-shaped hydrogel.mov
- S9-Tail shrinkage of a tadpole-shaped hydrogel.mov
